# Supplementary material
Source: Springer Nature journal article supplement (https://www.springermedizin.de/resource/supplementary/12889_2012_4947_MOESM2_ESM.pdf/9496416)
Supplement: MOESM2 [file 9496416]

UG County  
Administration

District  
Commissioner

District Officer

District  
Children's  
Officer

Chief

Assistant Chief

Village Elders
